# Supplementary material for: Toxic Responses of Different Shellfish Species after Exposure to Prorocentrum lima, a DSP Toxins Producing Dinoflagellate
Source: MDPI journal article supplement (doi:10.3390/toxins14070461), 2022-07-05
Supplement: s1 [file s1]

## Article

# Toxic Responses of Different Shellfish Species after Exposure to *Prorocentrum lima*, a DSP Toxins Producing Dinoflagellate

Mei-Hua Ye, Da-Wei Li, Qiu-Die Cai, Yu-Hu Jiao, Yang Liu, Hong-Ye Li and Wei-Dong Yang \*

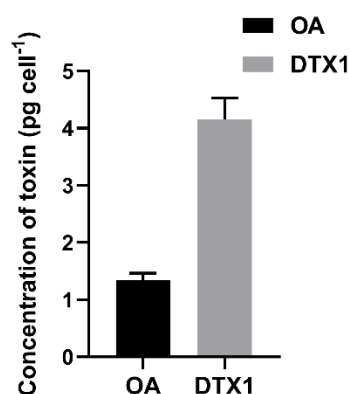

Figure S1. Toxins profile of *Prorocentrum lima*.
